# Supplementary material for: Nitrogen-doped carbon nanorods with excellent capacitive deionization ability
Source: Royal Society of Chemistry journal article supplement (doi:10.1039/c5ta03663a), 2015-01-01
Supplement: c5ta03663a1.pdf [file c5ta03663a1.pdf]

# **Nitrogen-doped carbon nanorods with excellent capacitive deionization ability**

Yong Liu, Xingtao Xu, Miao Wang, Ting Lu, Zhuo Sun, Likun Pan\*

*Engineering Research Center for Nanophotonics & Advanced Instrument,*

*Ministry of Education, Shanghai Key Laboratory of Magnetic Resonance, Department of*

*Physics, East China Normal University, Shanghai 200062, China*

---

\* Corresponding author. Tel: 86 21 62234132; Fax: 86 21 62234321; E-mail: lkpan@phy.ecnu.edu.cn

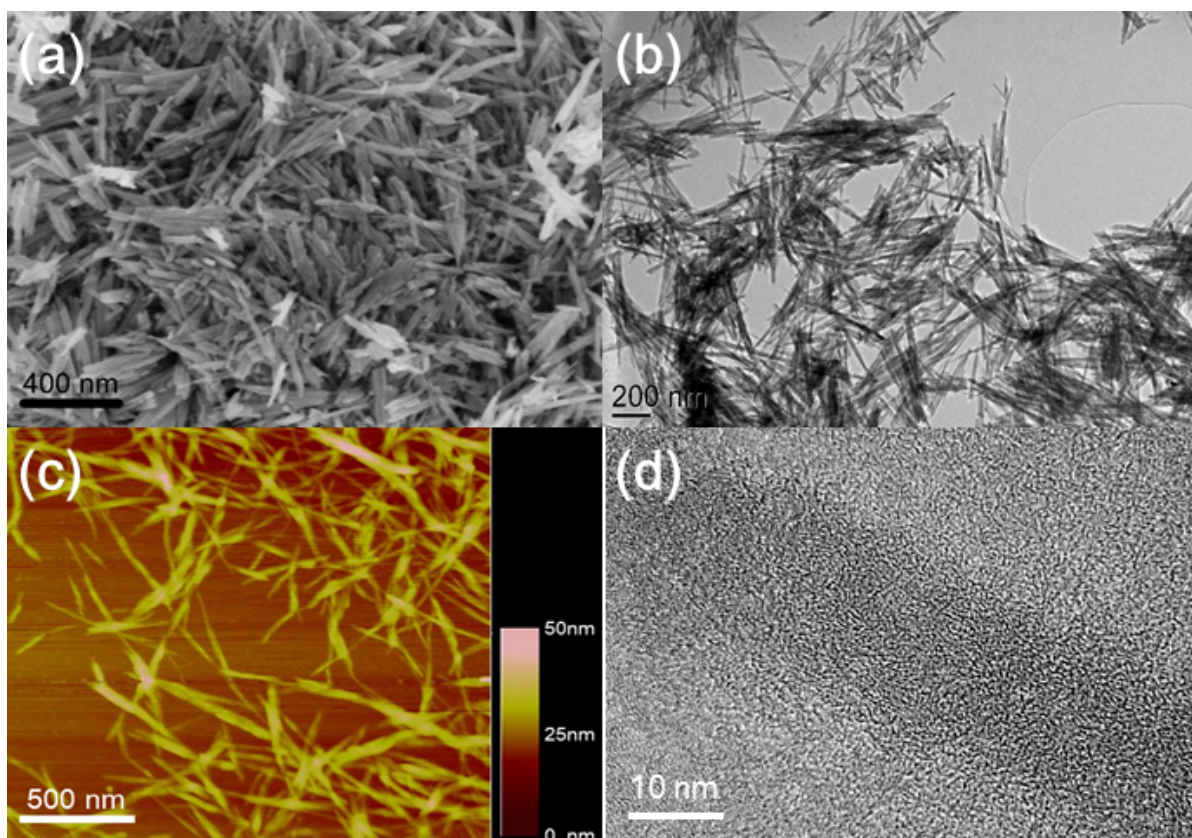

Fig. S1. (a) FESEM, (b) TEM, (c) AFM and (d) high resolution TEM images of CNR1000.<sup>1</sup>

## References:

1. Y. Liu, L. K. Pan, X. T. Xu, T. Lu, Z. Sun and D. H. C. Chua, *J. Mater. Chem. A*, 2014, **2**, 20966-20972.
